# Supplementary material for: Frequency of Abnormalities Detected by Point-of-Care Lung Ultrasound in Symptomatic COVID-19 Patients: Systematic Review and Meta-Analysis
Source: PubMed Central journal article supplement (PMC7410428; doi:10.4269/ajtmh.20-0371), 2020-06-02
Supplement: tpmd200371.SD1.pdf [file tpmd200371.SD1.pdf]

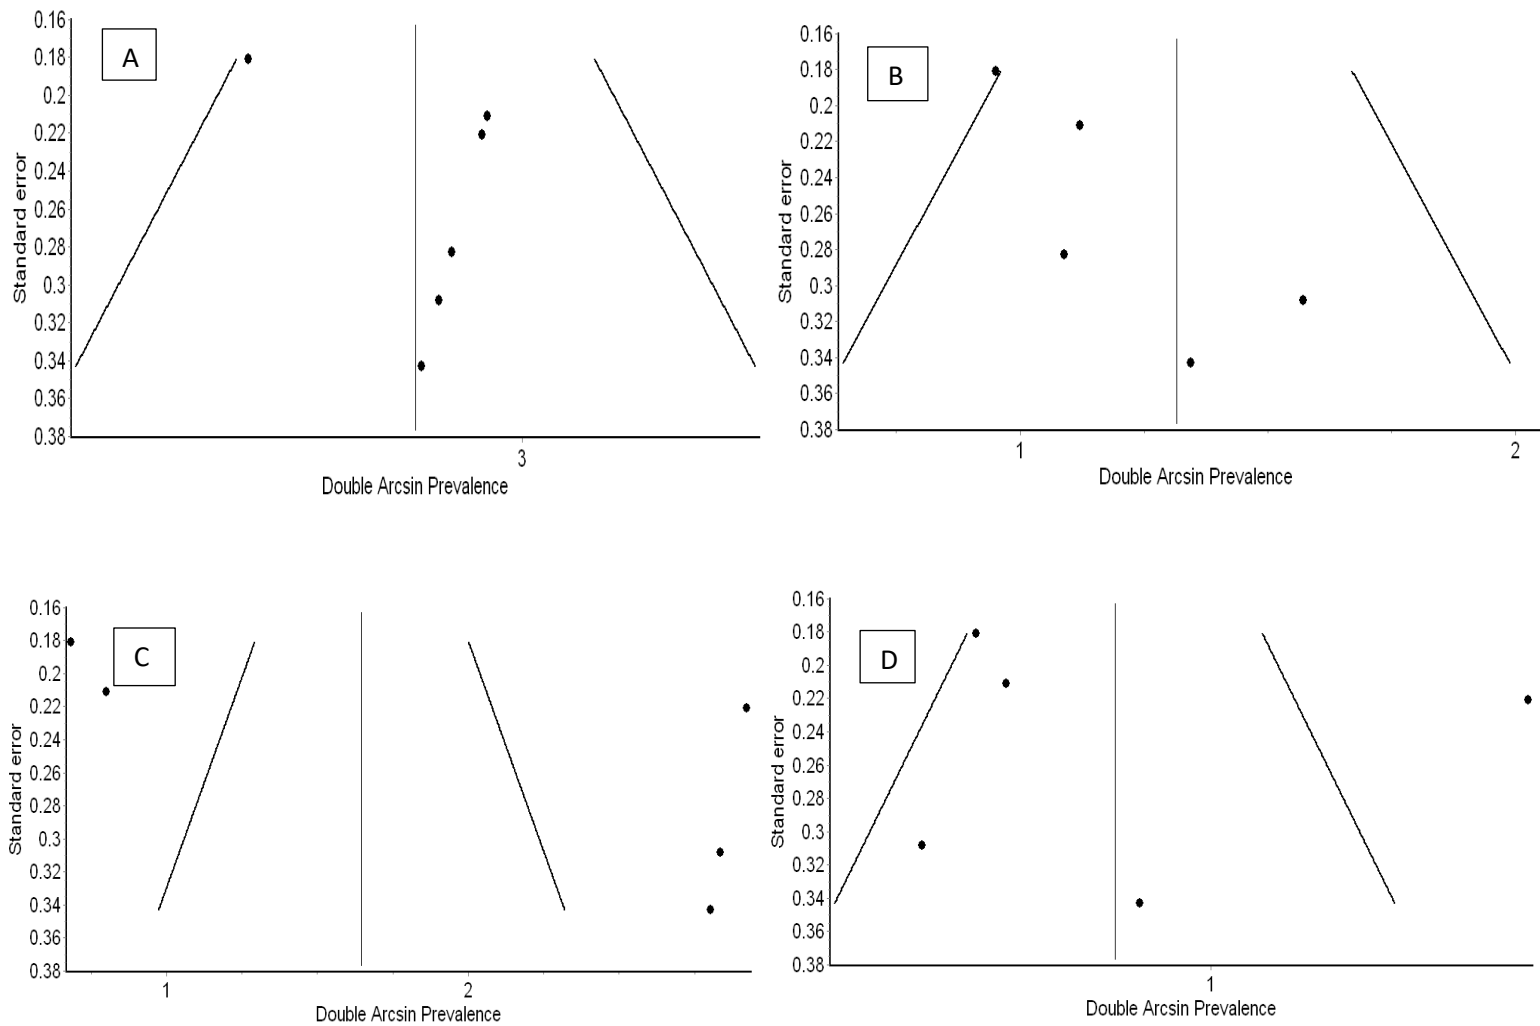

**Supplementary Figure 1:** Funnel plots to ascertain the publication bias in (A) B-pattern, (B) consolidations, (C) pleural line abnormalities, and (E) pleural effusion. It revealed potential publication bias in (C). Comparative DOI plots with LFK indices were populated for comparison. It showed no publication bias for (A) while showing a minor risk for (B), (E).

| Study         | Risk of bias      |            |                    |                 | Applicability concerns |            |                    |
|---------------|-------------------|------------|--------------------|-----------------|------------------------|------------|--------------------|
|               | Patient Selection | Index Test | Reference Standard | Flow and Timing | Patients Selection     | Index Test | Reference Standard |
| Lomoro 2020   | ?                 | ?          | 😊                  | ?               | ?                      | ?          | 😊                  |
| Peng 2020     | ?                 | ?          | ?                  | ?               | ?                      | ?          | ?                  |
| Huang 2020    | 😊                 | 😊          | 😊                  | ?               | 😊                      | 😊          | 😊                  |
| Poggiali 2020 | ?                 | ?          | ?                  | ?               | ?                      | ?          | 😊                  |
| Lu 2020       | ?                 | 😊          | 😊                  | 😊               | ?                      | 😊          | 😊                  |
| Lyu 2020      | ?                 | 😊          | 😊                  | ?               | ?                      | 😊          | 😊                  |
| Yasukawa 2020 | ?                 | 😊          | 😊                  | 😊               | 😊                      | ?          | 😊                  |

**Table S1:** Quality assessment of study included in the review (QUADAS2)

The reference test here is the diagnostic tests confirming the diagnosis of COVID-19. Most patients did not undergo CT scan simultaneously or at all. Most studies had unclear bias risk.

😊 Low risk of bias

☹ High risk of bias

? unclear risk of bias.
